# Supplementary material for: Morbidity After Mechanical Bowel Preparation and Oral Antibiotics Prior to Rectal Resection: The MOBILE2 Randomized Clinical Trial
Source: PubMed Central journal article supplement (PMC10955353; doi:10.1001/jamasurg.2024.0184), 2024-03-20
Supplement: jamasurg-e240184-s002.pdf [file jamasurg-e240184-s002.pdf]

## Supplemental Online Content

Koskenvuo L, Lunkka P, Varpe P, et al. Morbidity after mechanical bowel preparation and oral antibiotics prior to rectal resection (MOBILE2): a randomized clinical trial. *JAMA Surg*. Published online March 20, 2024. doi:10.1001/jamasurg.2024.0184

**eTable 1.** List of Specific Complications Within 30 Days After Surgery

**eTable 2.** Prespecified Subgroup Analyses for Overall Postoperative Complications (CCI) and SSIs

**eTable 3.** Neoadjuvant Treatment According to Tumor Stage

This supplemental material has been provided by the authors to give readers additional information about their work.

**eTable 1. List of Specific Complications Within 30 Days After Surgery**

| Clavien-Dindo grade and type - no. (%)               | Mechanical bowel preparation and placebo<br>(N=288) | Mechanical and oral antibiotic bowel preparation<br>(N=277) |
|------------------------------------------------------|-----------------------------------------------------|-------------------------------------------------------------|
| <b>None</b>                                          | <b>134 (46.5%)</b>                                  | <b>155 (56.0%)</b>                                          |
| <b>1 (one or more per patient)</b>                   | <b>116 (40.3%)</b>                                  | <b>109 (39.4%)</b>                                          |
| Wound infection                                      | 5 (1.7)                                             | 2 (0.7%)                                                    |
| Anastomotic dehiscence                               | 1 (0.3%)                                            | 0                                                           |
| Ileus (vomiting, nasogastric tube placement)         | 51 (17.7%)                                          | 48 (17.3%)                                                  |
| Electrolyte imbalance                                | 16 (5.6%)                                           | 17 (6.1%)                                                   |
| Collapse                                             | 4 (1.4%)                                            | 5 (1.8%)                                                    |
| Urinary retention                                    | 13 (4.5%)                                           | 10 (3.6%)                                                   |
| Incisional site bleeding (wound or anastomosis)      | 4 (1.4%)                                            | 5 (1.8%)                                                    |
| Incision resuturation                                | 2 (0.7%)                                            | 1 (0.4%)                                                    |
| Abnormal intensive incisional or operation site pain | 5 (1.7%)                                            | 1 (0.4%)                                                    |
| Fever                                                | 5 (1.7%)                                            | 4 (1.4%)                                                    |
| Problem with stoma site                              | 3 (1.0%)                                            | 8 (2.9%)                                                    |
| Delirium                                             | 1 (0.3%)                                            | 1 (0.4%)                                                    |
| Shortness of breath, Pain in chest                   | 6 (2.1%)                                            | 5 (1.8%)                                                    |
| Peroneal nerve Paralysis                             | 0                                                   | 1 (0.4%)                                                    |
| <b>2 (one or more per patient)</b>                   | <b>81 (28.1%)</b>                                   | <b>47 (17.0%)</b>                                           |
| Anastomotic dehiscence                               | 1 (0.3%)                                            | 0                                                           |
| Abscess at anastomotic site                          | 2 (0.7%)                                            | 1 (0.4%)                                                    |
| Wound infection                                      | 3 (1.0%)                                            | 4 (1.4%)                                                    |
| Prolonged ileus with medication                      | 11 (3.8%)                                           | 6 (2.2%)                                                    |
| Clostridium difficile infection                      | 0                                                   | 1 (0.4%)                                                    |
| Incisional site bleeding (wound or anastomosis)      | 13 (4.5%)                                           | 4 (1.4%)                                                    |
| Urinary tract infection                              | 14 (4.9%)                                           | 6 (2.2%)                                                    |
| Pneumonia                                            | 6 (2.1%)                                            | 5 (1.8%)                                                    |
| Urinary retention                                    | 4 (1.4%)                                            | 4 (1.4%)                                                    |
| Pulmonary embolism                                   | 6 (2.1%)                                            | 3 (1.1%)                                                    |
| TIA                                                  | 2 (0.7%)                                            | 0                                                           |
| Shortness of breath, Pain in chest                   | 3 (1.0%)                                            | 2 (0.7%)                                                    |
| Other infection (bacteremia, cholecystitis)          | 4 (1.4%)                                            | 2 (0.7%)                                                    |

|                                                 |                  |                  |
|-------------------------------------------------|------------------|------------------|
| Atrial fibrillation                             | 2 (0.7%)         | 3 (1.1%)         |
| Delirium                                        | 2 (0.7%)         | 0                |
| Incisional site pain                            | 1 (0.3%)         | 0                |
| Collapse                                        | 0                | 1 (0.4%)         |
| Fever                                           | 7 (2.4%)         | 6 (2.2%)         |
| <b>3a (one or more per patient)</b>             | <b>16 (5.6%)</b> | <b>8 (2.9%)</b>  |
| Anastomotic dehiscence, endoscopic management   | 9 (3.1%)         | 2 (0.7%)         |
| Abscess at anastomotic site, drainage           | 3 (1.0%)         | 2 (0.7%)         |
| Prolonged ileus with intervention               | 1 (0.3%)         | 1 (0.4%)         |
| Incisional site bleeding (wound or anastomosis) | 1 (0.3%)         | 3 (1.1%)         |
| Ascites                                         | 1 (0.3%)         | 0                |
| Headache, epidural blood patch                  | 1 (0.3%)         | 0                |
| <b>3b (one or more per patient)</b>             | <b>23 (8.0%)</b> | <b>10 (3.6%)</b> |
| Anastomotic dehiscence                          | 9 (3.1%)         | 6 (2.2%)         |
| Abscess at anastomotic site                     | 2 (0.7%)         |                  |
| Colonic perforation above anastomosis           | 1 (0.3%)         |                  |
| Fascial dehiscence                              | 3 (1.0%)         | 2 (0.7%)         |
| Stoma revision                                  | 3 (1.0%)         | 1 (0.4%)         |
| Prolonged ileus with intervention               | 2 (0.7%)         | 0                |
| Incisional site bleeding (wound or anastomosis) | 1 (0.3%)         | 0                |
| Intestinal strangulation                        | 1 (0.3%)         |                  |
| Intestinal perforation                          | 1 (0.3%)         | 0                |
| Incision resuturation                           | 0                | 1 (0.4%)         |
| <b>4a (one or more per patient)</b>             | <b>7 (3.1%)</b>  | <b>5 (1.8%)</b>  |
| Anastomotic dehiscence                          | 1 (0.3%)         | 1 (0.4%)         |
| Dyspnea                                         | 3 (1.0%)         | 1 (0.4%)         |
| Epileptic seizure                               | 1 (0.3%)         | 0                |
| Pneumonia                                       | 1 (0.3%)         | 0                |
| AKI                                             | 1 (0.3%)         | 0                |
| Hypotension                                     | 0                | 1 (0.4%)         |
| Cardiac failure                                 | 0                | 1 (0.4%)         |
| Intra-abdominal bleeding                        | 0                | 1 (0.4%)         |
| <b>4b (one or more per patient)</b>             | <b>4 (1.4%)</b>  | <b>0</b>         |

|                             |                             |                             |
|-----------------------------|-----------------------------|-----------------------------|
| Anastomotic dehiscence      | 4 (1.4%)                    | 0                           |
| <b>5 (equals death)</b>     | <b>1 (0.3%)<sup>a</sup></b> | <b>2 (0.7%)<sup>a</sup></b> |
| Acute myocardial infarction | 0                           | 1 (0.4%)                    |
| Anastomotic dehiscence      | 0                           | 1 (0.4%)                    |
| Aspiration pneumonia        | 1 (0.3%)                    | 0                           |

Data is presented as numbers (%s).

TIA, transient ischemic attack; AKI, acute kidney injury.

<sup>a</sup>A total of five patients died within 90 days, but this table shows complications and mortality up to 30 days.

**eTable 2.** Prespecified Subgroup Analyses for Overall Postoperative Complications (CCI) and SSIs

| Subgroup                                                      |                                 | Mechanical bowel preparation and placebo | Mechanical and oral antibiotic bowel preparation | Effect size (OR [95% CI] or r) | p value <sup>b</sup> |
|---------------------------------------------------------------|---------------------------------|------------------------------------------|--------------------------------------------------|--------------------------------|----------------------|
| <b><i>Tumor location</i></b>                                  |                                 |                                          |                                                  |                                |                      |
| <b>Lower edge &lt; 10cm from the anal verge</b>               |                                 | N=192                                    | N=191                                            |                                |                      |
|                                                               | CCI <sup>a</sup> , median (IQR) | 8.6603 (0-22.21)                         | 0 (0-8.66)                                       | 0.8147                         | <b>0.0003</b>        |
|                                                               | SSI, n (%)                      | 40 (20.8)                                | 15 (7.9)                                         | 0.324 (0.172-0.609)            | <b>0.0003</b>        |
|                                                               | Superficial                     | 3 (1.6%)                                 | 5 (2.6%)                                         |                                |                      |
|                                                               | Deep                            | 3 (1.6%)                                 | 1 (0.5%)                                         |                                |                      |
|                                                               | Organ                           | 34 (17.7%)                               | 9 (4.7%)                                         |                                |                      |
| <b>Lower edge ≥ 10cm from the anal verge</b>                  |                                 | N=96                                     | N=86                                             |                                |                      |
|                                                               | CCI <sup>a</sup> , median (IQR) | 0 (0-20.92)                              | 0 (0-9.56)                                       | 0.0749                         | 0.312                |
|                                                               | SSI, n (%)                      | 8 (8.3)                                  | 8 (9.3)                                          | 1.128 (0.404-3.148)            | 0.818                |
|                                                               | Superficial                     | 2 (2.1%)                                 | 1 (1.2%)                                         |                                |                      |
|                                                               | Deep                            | 1 (1.0%)                                 | 0                                                |                                |                      |
|                                                               | Organ/space                     | 5 (5.2%)                                 | 7 (8.1%)                                         |                                |                      |
| <b><i>Neoadjuvant treatment</i></b>                           |                                 |                                          |                                                  |                                |                      |
| <b>No or short-course radiotherapy with immediate surgery</b> |                                 | N=233                                    | N=224                                            |                                |                      |
|                                                               | CCI <sup>a</sup> , median (IQR) | 8.6603 (0-20.92)                         | 0 (0-8.66)                                       | 0.1725                         | <b>0.0003</b>        |
|                                                               | SSI, n (%)                      | 40 (17.2)                                | 12 (5.4)                                         | 0.273 (0.139-0.536)            | <b>&lt;0.0001</b>    |
|                                                               | Superficial                     | 5 (2.1%)                                 | 3 (1.3%)                                         |                                |                      |
|                                                               | Deep                            | 3 (1.3%)                                 | 0                                                |                                |                      |
|                                                               | Organ/space                     | 32 (13.7%)                               | 9 (4.0%)                                         |                                |                      |
| <b>Yes</b>                                                    |                                 | N=55                                     | N=53                                             |                                |                      |
|                                                               | CCI <sup>a</sup> , median (IQR) | 0 (0-20.92)                              | 0 (0-14.79)                                      | 0.0299                         | 0.758                |
|                                                               | SSI, n (%)                      | 8 (14.5)                                 | 11 (20.8)                                        | 1.539 (0.565-4.188)            | 0.397                |
|                                                               | Superficial                     | 0                                        | 3 (5.7%)                                         |                                |                      |
|                                                               | Deep                            | 1 (1.8%)                                 | 1 (1.9%)                                         |                                |                      |

|                           |                                 |                  |             |                     |               |
|---------------------------|---------------------------------|------------------|-------------|---------------------|---------------|
|                           | Organ/space                     | 7 (12.7%)        | 7 (13.2%)   |                     |               |
| <b>Protective ostomy</b>  |                                 |                  |             |                     |               |
| <b>Yes</b>                |                                 | N=222            | N=196       |                     |               |
|                           | CCI <sup>a</sup> , median (IQR) | 8.6603 (0-22.64) | 0 (0-8.66)  | 0.1865              | <b>0.0001</b> |
|                           | SSI, n (%)                      | 40 (18.0)        | 16 (8.2)    | 0.404 (0.219-0.748) | 0.0032        |
|                           | Superficial                     | 3 (1.4%)         | 5 (2.6%)    |                     |               |
|                           | Deep                            | 4 (1.8%)         | 1 (0.5%)    |                     |               |
|                           | Organ/space                     | 33 (14.9%)       | 10 (5.1%)   |                     |               |
| <b>No</b>                 |                                 | N=66             | N=81        |                     |               |
|                           | CCI <sup>a</sup> , median (IQR) | 0 (0-20.92)      | 0 (0-12.25) | 0.0065              | 0.937         |
|                           | SSI, n (%)                      | 8 (12.1)         | 7 (8.6)     | 0.686 (0.235-2.001) | 0.488         |
|                           | Superficial                     | 2 (3.0%)         | 1 (1.2%)    |                     |               |
|                           | Deep                            | 0                | 0           |                     |               |
|                           | Organ/space                     | 6 (9.1%)         | 6 (7.3%)    |                     |               |
| <b>Surgical approach</b>  |                                 |                  |             |                     |               |
| <b>Open</b>               |                                 | N=226            | N=214       |                     |               |
|                           | CCI <sup>a</sup> , median (IQR) | 8.6603 (0-21.35) | 0 (0-9.56)  | 0.1498              | <b>0.002</b>  |
|                           | SSI, n (%)                      | 40 (17.7)        | 18 (8.4)    | 0.427 (0.236-0.771) | 0.0040        |
|                           | Superficial                     | 4 (1.8%)         | 6 (2.8%)    |                     |               |
|                           | Deep                            | 3 (1.3%)         | 1 (0.5%)    |                     |               |
|                           | Organ/space                     | 33 (14.6%)       | 11 (5.1%)   |                     |               |
| <b>Minimally invasive</b> |                                 | N=62             | N=63        |                     |               |
|                           | CCI <sup>a</sup> , median (IQR) | 0 (0-20.92)      | 0 (0-8.66)  | 0.1325              | 0.139         |
|                           | SSI, n (%)                      | 8 (12.9)         | 5 (7.9)     | 0.582 (0.179-1.888) | 0.363         |
|                           | Superficial                     | 1 (1.6%)         | 0           |                     |               |
|                           | Deep                            | 1 (1.6%)         | 0           |                     |               |
|                           | Organ/space                     | 6 (9.7%)         | 5 (7.9%)    |                     |               |

Data is presented as medians with IQRs or numbers (%s).

CCI, comprehensive complication index; SSI, surgical site infection; OR, odds ratio; CI, confidence interval; IQR, interquartile range.

<sup>a</sup>Not normally distributed; hence, effect size is given as Wilcoxon effect size

<sup>b</sup>After Bonferroni correction for multiple comparisons, a p-value < 0.003125 is considered statistically significant (bold).

**eTable 3. Neoadjuvant Treatment According to Tumor Stage**

|                                                                             | Stage 1<br>n (%) | Stage 2<br>n (%) | Stage 3<br>n (%) | Stage 4<br>n (%) | All<br>n (%)   |
|-----------------------------------------------------------------------------|------------------|------------------|------------------|------------------|----------------|
| No                                                                          | 105<br>(99.1%)   | 88<br>(84.6%)    | 125<br>(45.6%)   | 9<br>(36.0%)     | 327<br>(64.2%) |
| Short course radiotherapy                                                   | 0                | 7<br>(6.7%)      | 59<br>(21.5%)    | 5<br>(20.0%)     | 71<br>(13.9%)  |
| Short course radiotherapy with delay                                        | 0                | 4<br>(3.8%)      | 3<br>(1.1%)      | 0                | 7<br>(1.4%)    |
| Chemoradiotherapy                                                           | 1<br>(0.9%)      | 5<br>(4.8%)      | 84<br>(30.7%)    | 6<br>(24.0%)     | 96<br>(18.9%)  |
| Chemotherapy only                                                           | 0                | 0                | 0                | 5<br>(20.0%)     | 5<br>(1.0%)    |
| Total neoadjuvant treatment with short course radiotherapy and chemotherapy | 0                | 0                | 3<br>(1.1%)      | 0                | 3<br>(0.6%)    |
| Total                                                                       | 106              | 104              | 274              | 25               | 509            |
